# Supplementary material for: Synthon transferability probed with IR spectroscopy: cytosine salts as models for salts of lamivudine
Source: Royal Society of Chemistry journal article supplement (doi:10.1039/c3ce42156b), 2013-12-12
Supplement: c3ce42156b.pdf [file c3ce42156b.pdf]

## Synthon transferability probed with IR spectroscopy: cytosine salts as models for salts of lamivudine

Shaunak Chakraborty, Somnath Ganguly and Gautam R. Desiraju\*

Solid State and Structural Chemistry Unit, Indian Institute of Science, Bangalore 560 012, India

E-mail: desiraju@sscu.iisc.ernet.in

Fax: +91 80 23602306

### Contents

|                   |                                                                                                                     |   |
|-------------------|---------------------------------------------------------------------------------------------------------------------|---|
| <b>Table S1</b>   | Hydrogen bond metrics                                                                                               | 2 |
| <b>Table S2</b>   | First pK <sub>a</sub> values of the dicarboxylic acids                                                              | 2 |
| <b>Figure S1</b>  | DSC curve of lamivudine-succinic acid and superposed DSC curves of lamivudine form 2 and succinic acid.             | 3 |
| <b>Figure S2</b>  | DSC curve of lamivudine-glutaric acid and superposed DSC curves of lamivudine form 2 and glutaric acid              | 3 |
| <b>Figure S3</b>  | DSC curve of lamivudine-adipic acid and superposed DSC curves of lamivudine form 2 and adipic acid                  | 4 |
| <b>Figure S4</b>  | Comparison of the PXRD patterns of pure lamivudine, pure succinic acid and the lamivudine-succinic acid co-crystal. | 4 |
| <b>Figure S5</b>  | Comparison of the PXRD patterns of pure lamivudine, pure glutaric acid and the lamivudine-glutaric acid co-crystal  | 5 |
| <b>Figure S6</b>  | Comparison of the PXRD patterns of pure lamivudine, pure adipic acid and the lamivudine-adipic acid co-crystal      | 5 |
| <b>Figure S7</b>  | ORTEP diagram of cytosine tribromoacetate                                                                           | 6 |
| <b>Figure S8</b>  | ORTEP diagram of lamivudine oxalate                                                                                 | 6 |
| <b>Figure S9</b>  | ORTEP diagram of lamivudine-pimelic acid co-crystal                                                                 | 7 |
| <b>Figure S10</b> | ORTEP diagram of lamivudine oxalate monohydrate                                                                     | 7 |

**Table S1: Hydrogen bond metrics for the co-crystal and the salts**

| Salt/co-crystal          | D-H...A                                             | Symmetry code       | D-H   | H...A | D-H...A |
|--------------------------|-----------------------------------------------------|---------------------|-------|-------|---------|
| Lamivudine-oxalate       | O <sub>34</sub> -H <sub>34</sub> ...O <sub>4</sub>  | -x+1, y-1/2, -z+1/2 | 0.820 | 2.025 | 2.772   |
|                          | N <sub>7</sub> -H <sub>3</sub> ...O <sub>2</sub>    | x, y-1, z           | 0.748 | 2.364 | 2.814   |
|                          | N <sub>7</sub> -H <sub>3</sub> ...O <sub>4</sub>    | x, y-1, z           | 0.748 | 2.536 | 3.268   |
|                          | N <sub>11</sub> -H <sub>2</sub> ...O <sub>1</sub>   | x-1/2, -y+1/2, -z   | 0.851 | 2.008 | 2.852   |
|                          | N <sub>8</sub> -H <sub>14</sub> ...O <sub>4</sub>   | x+1, y-1, z         | 0.785 | 2.117 | 2.867   |
|                          | O <sub>100</sub> -H <sub>23</sub> ...O <sub>2</sub> |                     | 0.616 | 2.231 | 2.846   |
|                          | N <sub>10</sub> -H <sub>75</sub> ...O <sub>1</sub>  | x+1/2, -y+1/2, -z   | 0.894 | 2.222 | 3.070   |
|                          | N <sub>10</sub> -H <sub>75</sub> ...O <sub>3</sub>  | x+1/2, -y+1/2, -z   | 0.894 | 2.250 | 2.774   |
|                          | N <sub>10</sub> -H <sub>45</sub> ...O <sub>2</sub>  | x-1/2, -y+1/2, -z   | 0.905 | 1.951 | 2.831   |
| Lamivudine- pimelic acid | N <sub>4</sub> -H <sub>2</sub> ...O <sub>7</sub>    | -x-1, y-1/2, -z+1   | 0.936 | 2.082 | 3.001   |
|                          | N <sub>4</sub> -H <sub>1</sub> ...O <sub>1</sub>    | x, y, z+1           | 0.946 | 2.044 | 2.928   |
|                          | O <sub>9</sub> -H <sub>12</sub> ...O <sub>7</sub>   | -x, y-1/2, -z       | 0.785 | 2.079 | 2.836   |
|                          | O <sub>10</sub> -H <sub>11</sub> ...O <sub>6</sub>  | x-1, y, z+1         | 0.875 | 1.930 | 2.762   |
|                          | N <sub>3</sub> -H <sub>9</sub> ...O <sub>2</sub>    | x, y, z-1           | 0.863 | 2.154 | 2.968   |
|                          | N <sub>3</sub> -H <sub>8</sub> ...O <sub>6</sub>    |                     | 0.878 | 2.058 | 2.918   |
|                          | O <sub>8</sub> -H <sub>8A</sub> ...N <sub>5</sub>   | -x-1, y+1/2, -z+1   | 0.840 | 1.789 | 2.624   |

Note: The hydrogen bond metrics for lamivudine oxalate monohydrate and cytosine tribromoacetate have not been given here because the hydrogen atoms could not be located from the difference Fourier map.

**Table S2. First pK<sub>a</sub> values of the dicarboxylic acids**

| Dicarboxylic acid | pK <sub>a1</sub> |
|-------------------|------------------|
| Oxalic            | 1.25             |
| Malonic           | 2.83             |
| Succinic          | 4.20             |
| Glutaric          | 4.31             |
| Adipic            | 4.43             |
| Pimelic           | 4.48             |

### DSC curves

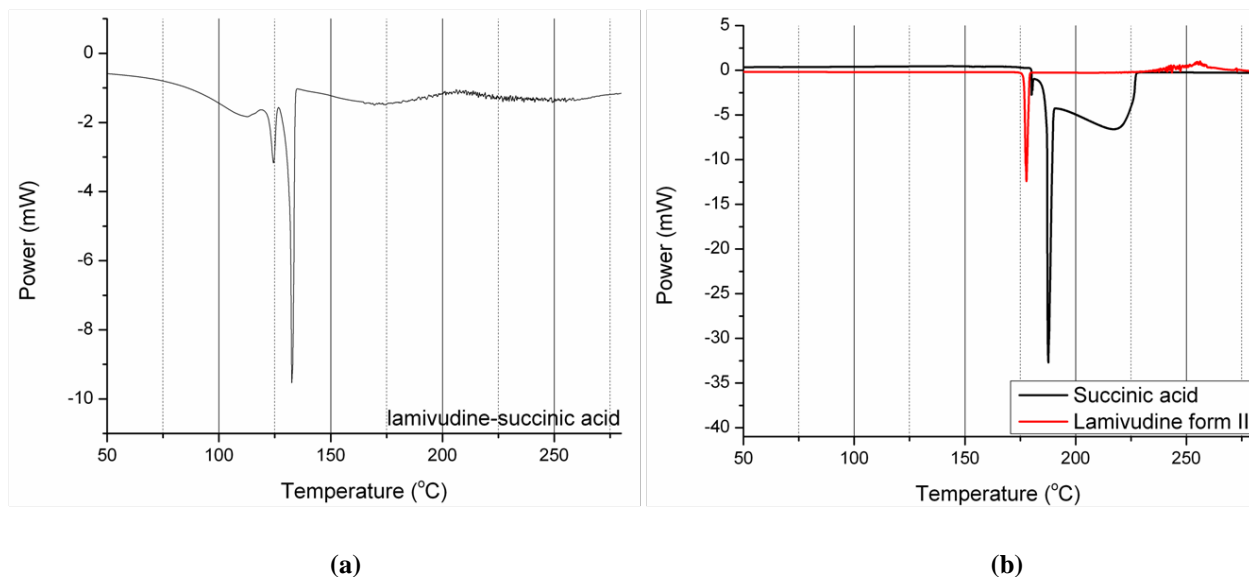

**Figure S1.** (a) DSC curve of lamivudine-succinic acid and (b) superposed DSC curves of lamivudine form 2 and succinic acid. The three curves have not been superposed because of the difference in the Y scale.

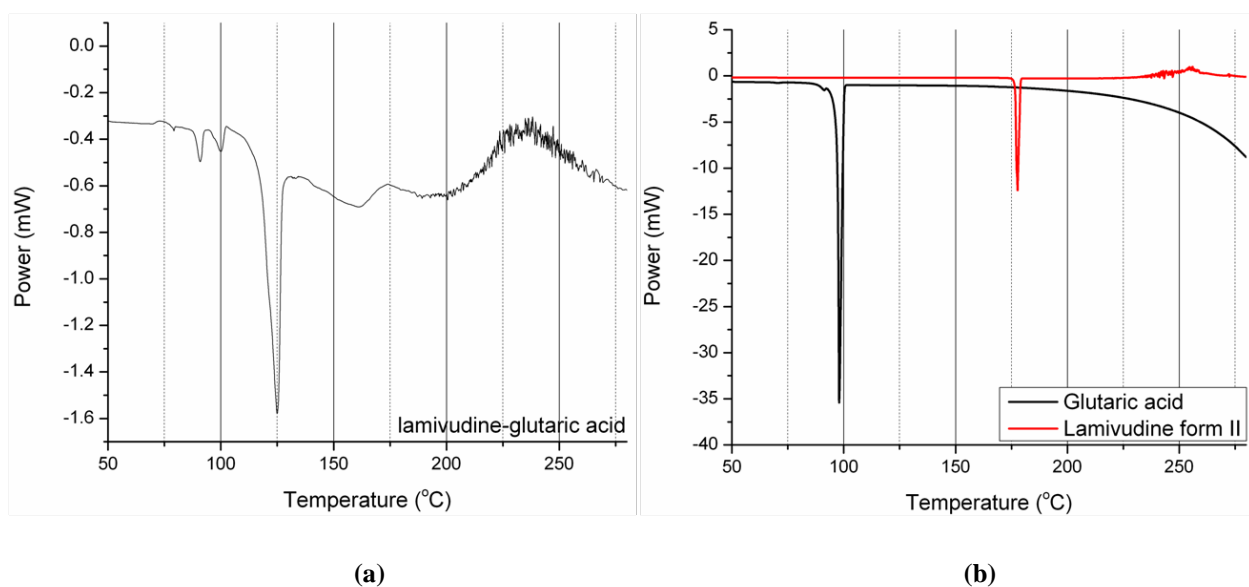

**Figure S2.** (a) DSC curve of lamivudine-glutaric acid and (b) superposed DSC curves of lamivudine form 2 and glutaric acid. The three curves have not been superposed because of the difference in the Y scale.

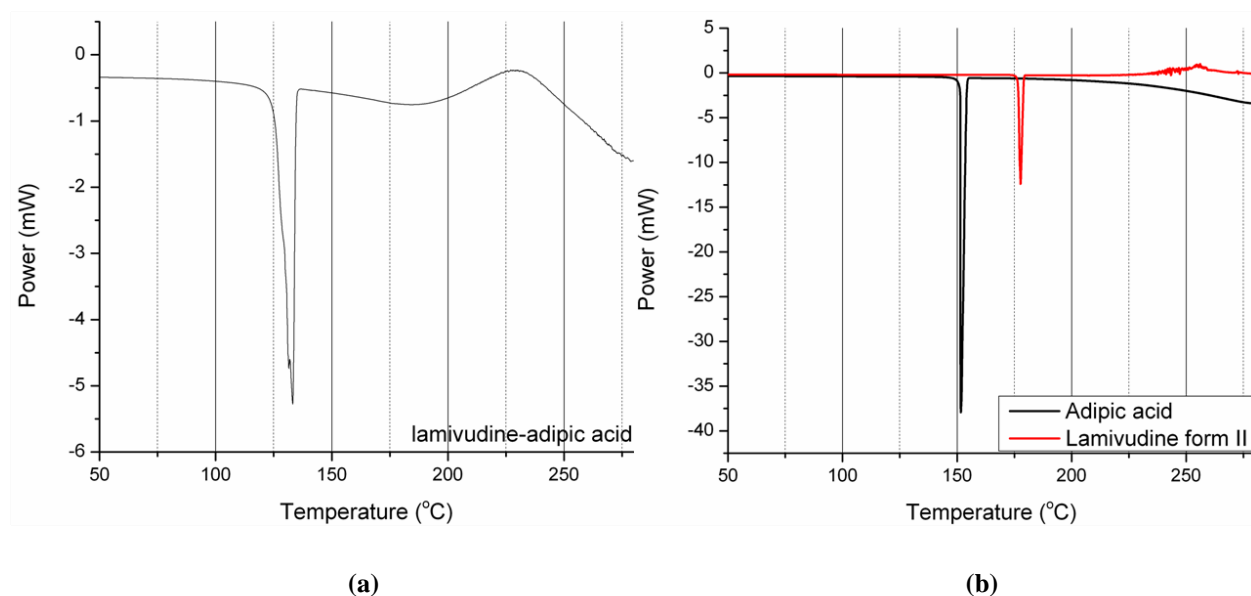

**Figure S3.** (a) DSC curve of lamivudine-adipic acid and (b) superposed DSC curves of lamivudine form 2 and adipic acid. The three curves have not been superposed because of the difference in the Y scale.

#### PXRD patterns

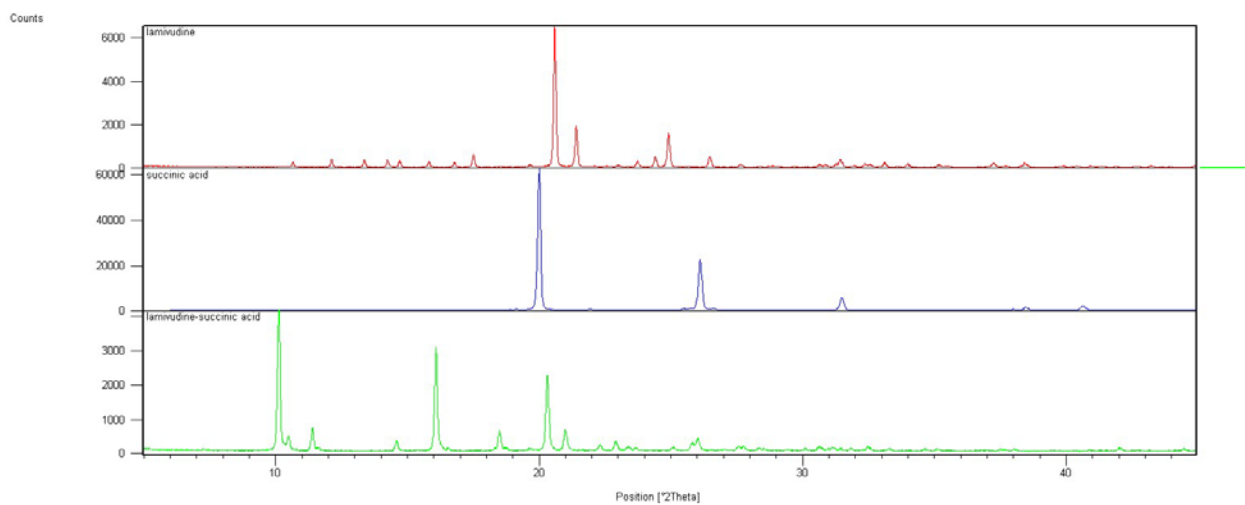

**Figure S4.** Comparison of the PXRD patterns of pure lamivudine, pure succinic acid and the lamivudine-succinic acid co-crystal.

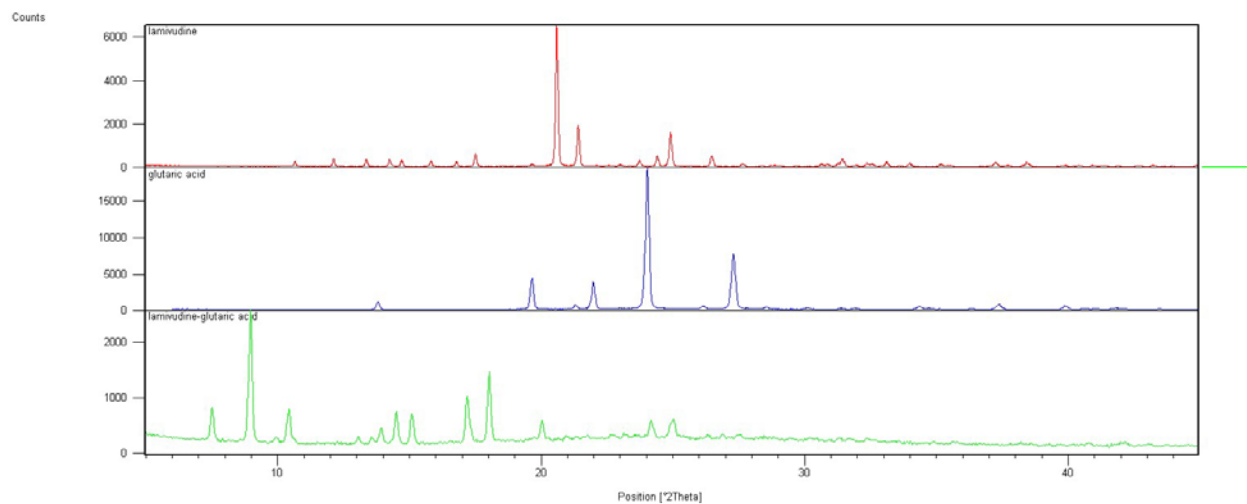

**Figure S5.** Comparison of the PXR D patterns of pure lamivudine, pure glutaric acid and the lamivudine-glutaric acid co-crystal.

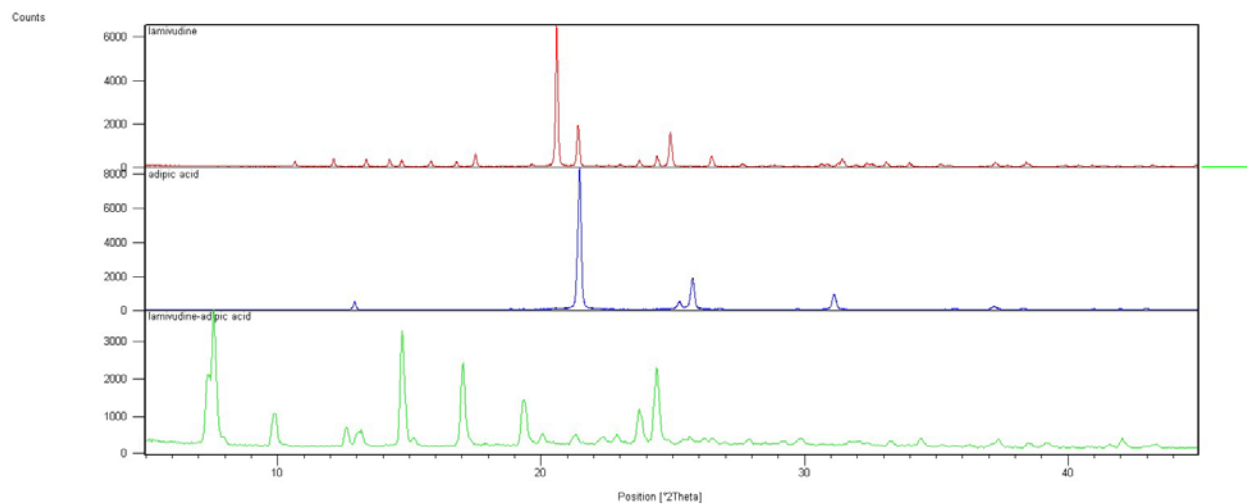

**Figure S6.** Comparison of the PXR D patterns of pure lamivudine, pure adipic acid and the lamivudine-adipic acid co-crystal

### ORTEP diagrams

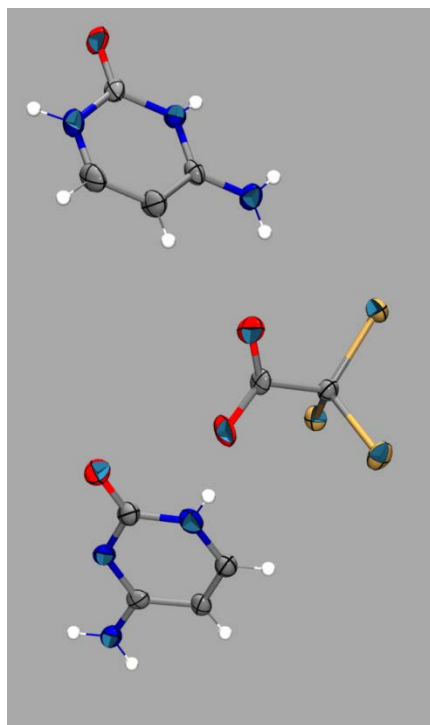

**Figure S7.** ORTEP diagram of cytosine tribromoacetate

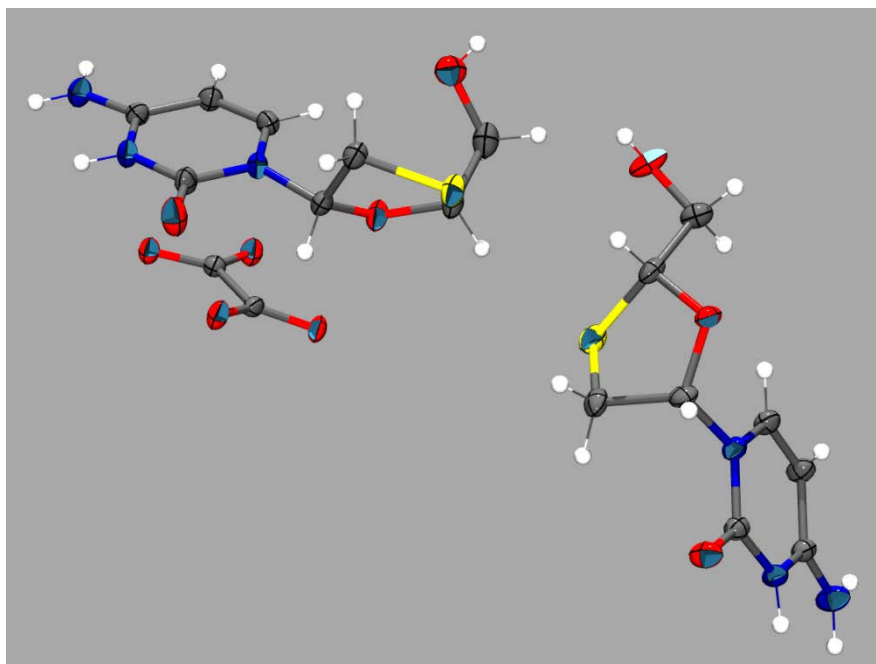

**Figure S8.** ORTEP diagram of lamivudine oxalate

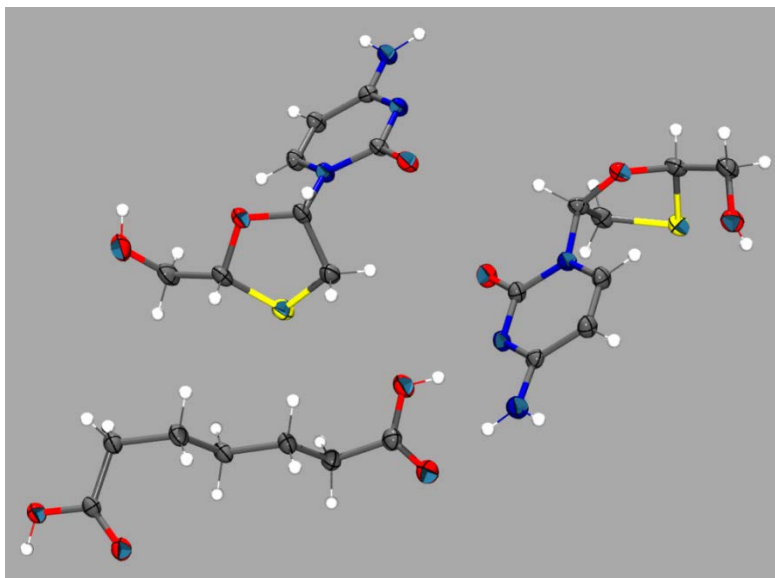

**Figure S9.** ORTEP diagram of lamivudine-pimelic acid co-crystal

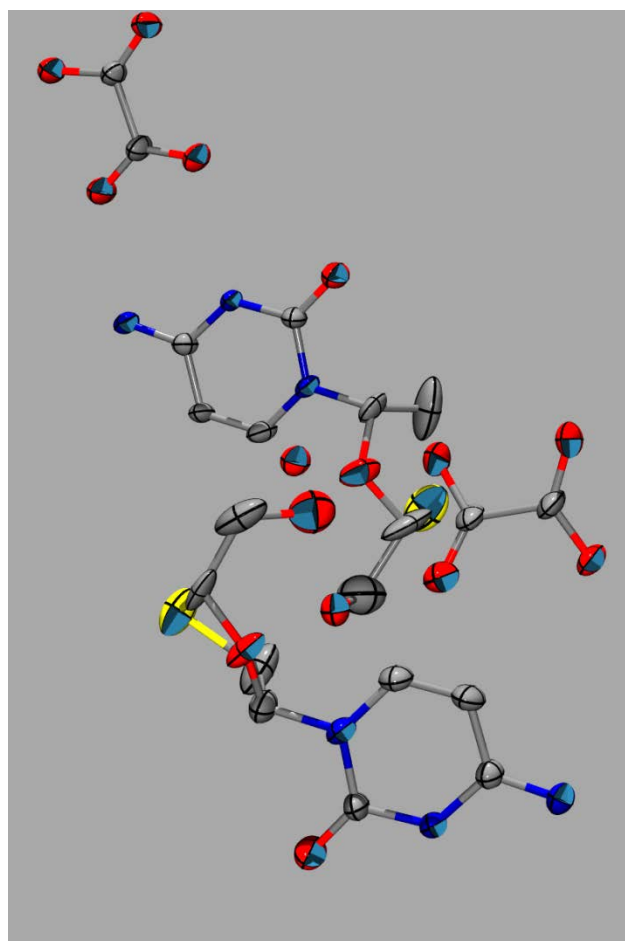

**Figure S10.** ORTEP diagram of lamivudine oxalate monohydrate
